# Supplementary material for: A Local Desiccant Antimicrobial Agent as an Alternative to Adjunctive Antibiotics in the Treatment of Periodontitis: A Narrative Review
Source: MDPI journal article supplement (doi:10.3390/antibiotics12030456), 2023-02-24
Supplement: s1 [file s1]

**Table S1.** Summarization of the clinical studies assessing periodontal and peri-implant treatment outcomes following the topical administration of HybenX.

| Author Year                   |              |                                                                                                |                                               |                                                                                                                                                                                                                                                        |                                                                                                                                                                                                                                                                                                                                                                                                                                                                           |
|-------------------------------|--------------|------------------------------------------------------------------------------------------------|-----------------------------------------------|--------------------------------------------------------------------------------------------------------------------------------------------------------------------------------------------------------------------------------------------------------|---------------------------------------------------------------------------------------------------------------------------------------------------------------------------------------------------------------------------------------------------------------------------------------------------------------------------------------------------------------------------------------------------------------------------------------------------------------------------|
| Reference Number              | Study Design | Clinical Cases                                                                                 | Objectives                                    | Therapeutical Intervention                                                                                                                                                                                                                             | Main treatment outcomes                                                                                                                                                                                                                                                                                                                                                                                                                                                   |
| Pini-Prato et. al., 2016 [58] | Case report  | Cases of acute periodontal abscess                                                             | Assessment of the clinical treatment outcomes | HY subgingival administration alone or in combination with flap surgery No systemic antibiotic therapy                                                                                                                                                 | Complete resolution of the acute periodontal abscess after treatment<br>Considerable reduction of the initial PD, ranging from 7 to 15 mm to PD ranging from 1.5 to 4mm, without BOP recorded at the variable follow-up intervals after treatment<br>Marked increase of the initial GR ranging from 3 to 5 mm for most patients                                                                                                                                           |
| Mancini et al., 2016 [97]     | Case report  | A case of acute periodontal abscess / A case of generalized periodontitis and peri-implantitis | Assessment of the clinical treatment outcomes | HY subgingival administration without subgingival mechanical instrumentation or systemic antibiotic therapy<br><br>HY topical administration with flap surgery and guided bone regeneration<br><br>No systemic antibiotic therapy                      | At 15 days follow-up:<br>Complete resolution of the acute periodontal abscess<br>Reduction of the initial PD from 7.5 mm to 5.5 mm and of the initial CAL of 5.5 mm to 5 mm<br><br>At 4 months follow-up:<br>Reduction of the initial PD from 6 mm to 1.5 mm and of the initial CAL of 4 mm to 2 mm at the mesial surface of the first molar<br>Reduction of the initial PD from 8 mm to 3 mm and of the initial CAL of 6 mm to 3 mm at the mesial surface of the implant |
| Nardi et al., 2013 [98]       | Case report  | A case of rheumatoid arthritis patient with periodontitis and peri-implantitis                 | Assessment of the clinical treatment outcomes | Individualized oral hygiene routine instructions<br>Professional oral hygiene regime consisting of air-abrasion with glycine powder, HY subgingival administration, ultrasonic and manual subgingival mechanical instrumentation, photodynamic therapy | At 1 month follow-up:<br>No detectable clinical signs of periodontal / peri-implant inflammation<br>No detailed description with respect to the clinical periodontal / peri-implant parameters                                                                                                                                                                                                                                                                            |

|                             |                  |                                                                   |                                                                                                                            |                                                                                                                                                                                                                                                                        |                                                                                                                                                                                                                                                                                                                                                                                                                                                                                                                                                                                                                       |
|-----------------------------|------------------|-------------------------------------------------------------------|----------------------------------------------------------------------------------------------------------------------------|------------------------------------------------------------------------------------------------------------------------------------------------------------------------------------------------------------------------------------------------------------------------|-----------------------------------------------------------------------------------------------------------------------------------------------------------------------------------------------------------------------------------------------------------------------------------------------------------------------------------------------------------------------------------------------------------------------------------------------------------------------------------------------------------------------------------------------------------------------------------------------------------------------|
| Lauritano et al., 2015 [61] | Case series      | Patients with moderate periodontitis                              | Assessment of microbiological treatment outcomes                                                                           | One-time HY subgingival administration                                                                                                                                                                                                                                 | At 15 days follow-up:<br>A marked reduction of <i>Porphyromonas gingivalis</i> , <i>Tannerella forsythia</i> , <i>Treponema denticola</i> and of the total subgingival bacterial load                                                                                                                                                                                                                                                                                                                                                                                                                                 |
| Lombardo et al., 2015 [63]  | RCT              | Patients with mild and severe periodontitis                       | Assessment of clinical periodontal and microbiological treatment outcomes                                                  | Test group: HY subgingival administration + ultrasonic subgingival mechanical instrumentation<br>vs.<br>Control group: ultrasonic subgingival mechanical instrumentation                                                                                               | At 3 months follow-up:<br>A significant improvement in the plaque, BOP and gingival index scores in the test group compared to the control group<br>No significant difference in PD and CAL between the two groups<br>No significant difference in the bacterial load reduction between the two groups                                                                                                                                                                                                                                                                                                                |
| Isola et al., 2018 [65]     | RCT              | Patients with periodontitis                                       | Assessment of clinical periodontal, immunological, and microbiological treatment outcomes                                  | Test group: HY subgingival administration + manual and ultrasonic subgingival instrumentation<br>vs.<br>Control group: manual and ultrasonic subgingival mechanical instrumentation                                                                                    | At 12 months follow-up:<br>Significantly improved PD, CAL, and BOP in the test group compared to the control group<br>Significant reduction of <i>Porphyromonas gingivalis</i> , <i>Tannerella forsythia</i> , <i>Treponema denticola</i> , <i>Fusobacterium nucleatum</i> , <i>Fusobacterium polymorphum</i> , <i>Fusobacterium periodonticum</i> , <i>Prevotella intermedia</i> in the test group compared to the control group<br>Significant reduction of the mean level of IL-1 $\beta$ , TNF- $\alpha$ , IL-1 $\beta$ /IL-10 from the gingival crevicular fluid in the test group compared to the control group |
| Zafar et al., 2021 [100]    | Experimental RCT | Patients with stage III/IV periodontitis and minimum one hopeless | Assessment of residual subgingival plaque and calculus deposits and of the mean cleaning depth in deep periodontal pockets | Test group: HY subgingival administration + manual and ultrasonic subgingival mechanical instrumentation<br>vs.<br>Control group: manual and ultrasonic subgingival mechanical instrumentation<br><br>Subsequent extraction of a hopeless posterior multirrooted teeth | Immediately following treatment and extraction of the hopeless teeth:<br>A significantly narrower subgingival root area covered by residual plaque and calculus deposits in the test group compared to the control group<br>A significantly lower percentage of residual plaque in the test group compared to the control group<br>A significantly lower percentage of residual calculus deposits in the test group compared to the control group<br>A significantly higher mean cleaning depth for the control group compared to the test group                                                                      |

|                                                                                                                                                                                       |                                    |                                   |                                                                                     |                                                                                                                              |                                                                                                                                                                                                                                                                                                                                                                                    |
|---------------------------------------------------------------------------------------------------------------------------------------------------------------------------------------|------------------------------------|-----------------------------------|-------------------------------------------------------------------------------------|------------------------------------------------------------------------------------------------------------------------------|------------------------------------------------------------------------------------------------------------------------------------------------------------------------------------------------------------------------------------------------------------------------------------------------------------------------------------------------------------------------------------|
| Lopez et al.,<br>2016<br>[72]                                                                                                                                                         | Case report<br>study               | Cases of peri-<br>implantitis     | Assessment of clinical<br>peri-implant and<br>microbiological<br>treatment outcomes | HY topical administration alone or in<br>combination with open flap debridement<br>and guided bone regeneration              | At 3 months follow-up:<br><br>Marked reduction of the red complex bacteria and of the periodontal pockets in<br>milder forms of peri-implantitis<br><br>Lack of suppuration but a tendency of increase in the total bacterial load and in the<br>count of red complex bacteria                                                                                                     |
| Pini-Prato et<br>al., 2016<br>[102]                                                                                                                                                   | Case report<br>study               | Cases of peri-<br>implantitis     | Assessment of the<br>clinical and<br>radiographic<br>treatment outcomes             | HY topical administration without<br>mechanical instrumentation or systemic<br>antibiotic therapy                            | Considerable reduction of the initial PD, ranging from 5 to 8mm, to PD of up to<br>4mm, without BOP and a modest increase of the GR at the 3 months follow-up.<br><br>Healthy peri-implant soft tissues at the 6 months follow-up<br><br>Signs of bone remineralization at the 6 months follow-up for most patients<br><br>Treatment results remained stable at 6 months follow-up |
| Lombardo et<br>al., 2015<br>[103]                                                                                                                                                     | Case report<br>study               | A case of peri-<br>implantitis    | Assessment of the<br>clinical and<br>radiographic<br>treatment outcomes             | Open flap debridement with HY topical<br>administration, low abrasive air powder<br>abrasion<br>and guided bone regeneration | At 2 years follow-up:<br><br>Reduction of the mean PD of up to 5.5 mm; CAL of up to 5.1 mm complete absence<br>of BOP<br><br>Increase of radiographic first bone-to-implant contact of up to 8 mm<br><br>Percentage of radiographic bone fill of more than 90%                                                                                                                     |
| Lopez et al.,<br>2021<br>[64]                                                                                                                                                         | Clinical<br>observational<br>study | Patients with<br>peri-implantitis | Assessment of the<br>clinical and<br>radiographic<br>treatment outcomes             | HY topical administration in combination<br>with open flap debridement                                                       | At 12 month follow-up:<br><br>No suppuration in any of the cases<br><br>Mean PD reduction of 3.1 mm and mean attachment gain of 3.6 mm<br><br>BOP present in 6% of implant sites<br><br>Mean bone gain of 3.4 mm and mean percentage of radiographic bone fill of 58.6%                                                                                                            |
| Abbreviations: BOP=Bleeding on probing; CAL=Clinical Attachment Level; GR=Gingival Recession, HY=HybenX®; IL=Interleukin, RCT=Randomized Controlled Trial; TNF=Tumor necrosis factor. |                                    |                                   |                                                                                     |                                                                                                                              |                                                                                                                                                                                                                                                                                                                                                                                    |
